# Supplementary material for: Genomic variation analysis and discovery of stable heterozygous loci in Loquat (Eriobotrya japonica)
Source: Research Square preprint supplement (doi:10.21203/rs.3.rs-8035482/v1), 2025-12-08
Supplement: Supplementary file 1 [file 882adb88c2cc9388bd7436d4.xlsx]

## Sheet: Supp Table S1
Supplementary Table S1. List of primers for screening heterozygous loci
	Gene	Chrom	Location	F	R
1	EVM0042960	LG01	13188993-13188998	CTGAAAATCATTGGTCACCGAAC	CTACGGCAACTCGAGGAACT
2	EVM0012834	LG01	34656832-34656836	AGCCGATAAGCAACTTCACCC	CGCACCCTCTTTGTTGGTCT
3	EVM0021902	LG01	45926222-45926224	TGCACTAGATTAGTCGCCACA	TGGCTCTGATACTAGCAAGCA
4	EVM0033760	LG02	11847584-11847585	CGCGGTGGCTGAAATATCCAAAC	AGTTCACCGGGCATTGGATT
5	EVM0018441	LG02	14171948-14171949	CCACTGTCCAAGTACCCCAA	GTAGAACTTCACCCCTAAGAGC
6	EVM0017822	LG02	35434964-35434964	CCATCTTGTTTAAGTGCAAGG	GCAGTTAATAGATTGATCCCCAT
7	EVM0045501-1	LG03	20382511-20382522	GCGGTATTTTCTGTCCCGAGA	ATTAGGCATTACAAATGGGAGC
8	EVM0018056	LG04	4449645-4449656	AGTAACTCCACATAACGGCTA	CAAACCTCGTCTCATGTTGT
9	EVM0024702	LG04	10167783-10167787	TAATCTCTCTTGCCGCTCA	AAGAATTCCCCTTTTGTACCA
10	EVM0034929	LG04	10713394-10713396	AACTCTATGAGATGACCGTA	CCCTGTTTCTTATGCACGA
11	EVM0042337-1	LG05	1542259-1542262	GCTGCTTGGAGATCAATCCCT	GGGGCTCTTGTAAATCCCAT
12	EVM0027914	LG06	5820985-5820985	AGTTCATCTACAAATAAGACGAC	TTCCATACCATTCTCGCCAA
13	EVM0020561	LG06	8184747-8184752	TTGCTCAGTATGCTCGGCTT	TCTTGCACGTACCCTCGAAC
14	EVM0044994	LG06	20900901-20900903	GCTTGCCAATTCCTTAGACGGTA	TCTTCTGTTGCCTTTGAACCC
15	EVM0016869	LG06	31849521-31849521	CGTATCTTCCGAGTCAACCAC	CCTCCTCCAGTCCGTCCAC
16	EVM0013975	LG06	32352668-32352668	CCGACATCCATCAACTCCGTA	CCACTCAAAGTCGGGATTGC
17	EVM0045658	LG08	26744302-26744306	TCAATCTGAATCACCACCGAT	AGAATGTGAGCAAACAACGC
18	EVM0029309	LG08	27537588-27537591	CGTCCCTGTTGATTTATATGCC	CTGTGAATCCCTTTCGTGT
19	EVM0034547	LG08	30600243-30600268	TAGCCTAACAGATTCAGCAACC	TTGTGGAGAATGGAAGAAGCC
20	EVM0034148	LG09	20334309-20334311	ATTCTAAAACGGACGAAACCAA	CAGGTTCCCGATCATATGAATTA
21	EVM0010555	LG09	28914692-28914698	CTGCCTCTTAACTAAAATTTCGG	AAACTATACATGGATGTTCGC
22	EVM0016290	LG09	31285124	CCGTAATTCCAAAAGTCTTGC	GAAACACAGCCATATCTTGGT
23	EVM0037586	LG09	35973047-35973049	AGAAGAGAAACTACGCAACCCTC	ACACTGATTTTACCTGGACGTT
24	EVM0016043	LG09	36912014	AACCCCATCAACCCTACCC	AGGATGCCATTACCTTCGC
25	EVM0016038	LG10	9288618	AAATGAAACTCTTAGTCGGTC	CAGATGCACTACTTACTGG
26	EVM0002690	LG10	32340897-32340905	CAACACCAATAGCGGCAAC	TCGGCTAATCTCAAGCAAC
27	EVM0044229	LG10	33084984-33084985	AAGCCTTCATTCAAAGCGTGT	CTGAAAGACCAACCATGCACGAG
28	EVM0026592	LG10	36238158-36238158	AGCCGCTCTACTTTGCCATCG	CGTTCTCCCCATGGTGCTCA
29	EVM0009023	LG11	7010931	ACTATTCGATGCACAATATCCG	CAAAGGCTCACCTCATGGA
30	EVM0038479	LG12	2842036-2842049	GAAGGACCAAGCTCGCCAGT	CACCAGCTTCGTCTCATCCAC
31	EVM0008096	LG13	22278490-22278491	TCCTCCGTGTAAGATTGTCC	AGTATGTATTGCAGCTTGACAC
32	EVM0034026	LG13	30404525-30404530	ACGACGCAATCTTGAACGG	CAGAGGCTAAAACAAACGCACC
33	EVM0004062	LG14	15554194-15554205	CACAATGGCCGAATTGCTT	ATGCAGTCTTCTTTCGGTGT
34	EVM0026922	LG14	15865976-15865978	CTGAGAACCACCAGCCGAA	CTTTTGTTCCGCCTATGCC
35	EVM0012385	LG14	24842870-24842884	CTTTTCTCTTCAATCCGCCAT	AGCTGGATTGACAAATAGACCT
36	EVM0009340	LG14	26942446-26942493	ATGCACACATCTCTCTTAACAGG	GCACCAAAGGCTGGATTACT
37	EVM0022988	LG15	4760952-4760952	CGCCTTTCACTTCCCTTGCAT	TTTGACTTCGGACAACATCGTTC
38	EVM0028658	LG15	8630795-8630797	ATTTCCAGGTATAAAGCAAGGC	GAACCCCTGAGGCTGTTTCATA
39	EVM0024012	LG15	23710326	ACTGTGACACGAATCAACGA	TTAAGCCAACTTGAGCCGGAA
40	EVM0002100	LG16	4655765-4655767	ATTCCCTGCCATAACTACCTTG	GTCATTCAGCATCATTAGCTC
41	EVM0037247	LG16	28936231-28936237	TGTTCATCATAAGCAGCGTGT	AAATCTTTATGGCTCGGGAC
42	EVM0028689	LG17	11504142	CCCCCATCGAAGCCGTCTG	CTTCTGCCGTCGGTGCCAA
43	EVM0027630	LG17	33172691-33172702	GCGGAGCGTGTTTTCTCAGATCA	CTTCTCCTCCGGTTTCGCCTC
44	EVM0026633	LG07	20445585-20445590	ACTCCTTAGATCTTCATACTCGG	GGACATTCCCAGTGCCCAA
45	EVM0034143	LG07	30497271-30497274	TATTCTTTGCAGGCTCGAT	TCCCAAAGAACAGATAAGGC
46	EVM0038795	LG07	37316538	AATCACAATTGCCATGTTCCA	GCTTTGCTCCGTTTATGTGACC
47	EVM0033240	LG07	39289330	CTTTTCAATGTAGTGCAACTCT	TATCTTGTCGCATTTGTCCCT
48	EVM0044966	LG07	42340169-42340185	AATTCGAGGTCGGTGATAAGA	TTTTCTCTAGTTCACCGGCAC

## Sheet: Supp Table S2
Supplementary Table S2. Primer table for gene expression levels at different loci
Gene	F	R
EVM0016038	GAATAAGGGAGGTGCTGCCA	ATCCCTCCATGCTGCTGAAC
EVM0009023	GACCCTAACCAAAGGCTCACC	CGACATCAACCTACTCGGAACG

## Sheet: Supp Table S3
Supplementary Table S3. Sequence alignment results and the sequencing depth
Sample	Total_reads	Mapped_reads	Mapping_rate	Average_sequencing_depth
GZ-8	100612125	98249106	0.9765	15.08
GZ-9	99447849	98371492	0.9892	15.24
GZ-16	105084247	104568470	0.9951	16.17
GZ-18	97317902	96968013	0.9964	14.99
GZ-36	108602164	108232481	0.9966	16.55
GZ-56	106391512	105904047	0.9954	16.13
GZ-58	105471292	103277685	0.9792	16.04
GZ-61	107349540	105591830	0.9836	16.21
GZ-4-31	107847120	106608437	0.9885	16.72
LNN	103374038	102615411	0.9927	15.55
FDZS	98852765	97336704	0.9847	15.09
GYLY	110232460	109614950	0.9944	16.92
HSC	115766270	114688547	0.9907	17.75
ZF	108205555	103583527	0.9573	15.63
SMYG	114086935	113567650	0.9954	17.32
GZ-7	104834313	103311500	0.9855	16.13
BY	109716190	109292064	0.9961	17.53
GF	100388873	100182198	0.9979	15.1
DWX	113429782	113290860	0.9988	17.21
BTZ	96567279	96332302	0.9976	14.89
HB1	166097474	165112791	0.9941	26.44
ZZ6	112788626	112475134	0.9972	17.72
RTBS	108401613	108152354	0.9977	17.24
H30-6	100839197	100189682	0.9936	16.1
DYWB	163195235	161707052	0.9909	25.52
SWZS	107812128	106104998	0.9842	16.79
MARC	97408899	97118126	0.997	15.09
PELL	109912755	109459850	0.9959	17.44

## Sheet: Supp Table S4
Supplementary Table S4.Number of InDel loci that are heterozygous across all materials.
Chromosome	Number of sites	Heterozygous locus	Non-heterozygous locus	Proportion of heterozygous loci
LG1	4138	3	4135	0.000725
LG2	4053	3	4050	0.00074
LG3	3460	1	3459	0.000289
LG4	3437	4	3433	0.001164
LG5	3754	0	3754	0
LG6	3404	6	3398	0.001763
LG7	2709	3	2706	0.001107
LG8	2380	4	2376	0.001681
LG9	3137	4	3133	0.001275
LG10	3429	0	3429	0
LG11	3031	3	3028	0.00099
LG12	2631	6	2625	0.002281
LG13	3212	1	3211	0.000311
LG14	2100	2	2098	0.000952
LG15	2879	4	2875	0.001389
LG16	2472	2	2470	0.000809
LG17	6076	3	6073	0.000494

## Sheet: Supp Table S5
Supplementary Table S5.Number of SNP loci that are heterozygous across all materials.
Chromosome	Number of sites	Heterozygous locus	Non-heterozygous locus	Proportion of heterozygous loci
LG1	118459	13	118446	0.00011
LG2	112679	20	112659	0.000177
LG3	104606	8	104598	7.6e-05
LG4	94706	7	94699	7.4e-05
LG5	110240	7	110233	6.3e-05
LG6	98058	15	98043	0.000153
LG7	85452	10	85442	0.000117
LG8	77222	4	77218	5.2e-05
LG9	101788	17	101771	0.000167
LG10	100393	14	100379	0.000139
LG11	90793	6	90787	6.6e-05
LG12	76452	11	76441	0.000144
LG13	93371	6	93365	6.4e-05
LG14	64358	11	64347	0.000171
LG15	82527	13	82514	0.000158
LG16	75789	10	75779	0.000132
LG17	82039	10	82029	0.000122

## Sheet: Supp Table S6
Supplementary Table S6. SNP result statistics in each sample
Sample	HOM_REF	HET	UNKNOWN	HOM_ALT
GZ-8	22149936	5240167	1675680	4821808
GZ-9	24785896	5308323	1105182	2688190
GZ-16	22304087	5460588	1532609	4590307
GZ-18	23600783	5425688	1283120	3578000
GZ-36	24929671	7055422	672593	1229905
GZ-56	26493253	3578406	1205472	2610460
GZ-58	25282950	6534789	746686	1323166
GZ-61	25451119	3241330	1444685	3750457
GZ-4-31	29822043	2806903	631171	627474
LNN	22566879	6294495	1220241	3805976
FDZS	27571184	2624189	1198772	2493446
GYLY	22187335	5480339	1541083	4678834
HSC	29519449	2165864	939142	1263136
ZF	25493533	5293740	991727	2108591
SMYG	28656689	2251200	1137932	1841770
GZ-7	28811898	2606338	994392	1474963
BY	30346457	2412048	546549	582537
GF	28817866	2435693	1101446	1532586
DWX	28917297	3021592	865845	1082857
BTZ	28878048	2584542	985135	1439866
HB1	28820268	1706483	1236783	2124057
ZZ6	28865490	2829587	918875	1273639
RTBS	29823223	2813197	625322	625849
H30-6	29094087	1864994	1234523	1693987
DYWB	28673428	2102076	1185726	1926361
SWZS	29049079	2505033	976860	1356619
MARC	27967511	3863887	818890	1237303
PELL	27974239	3883700	788973	1240679

## Sheet: Supp Table S7
Supplementary Table S7. InDel result statistics in each sample
Sample	HOM_REF	HET	UNKNOWN	HOM_ALT
GZ-8	1402267	443356	367995	725143
GZ-9	1560931	483386	279148	615296
GZ-16	1402866	484682	340924	710289
GZ-18	1478985	491491	308098	660187
GZ-36	1569606	642895	214597	511663
GZ-56	1689376	361542	274474	613369
GZ-58	1593150	586630	241505	517476
GZ-61	1611868	326796	304457	695640
GZ-4-31	1940728	317600	173398	507035
LNN	1409681	548341	304275	676464
FDZS	1777532	276576	268826	615827
GYLY	1397713	478420	335384	727244
HSC	1922830	254394	206372	555165
ZF	1635271	472934	252414	578142
SMYG	1873853	250796	223720	590392
GZ-7	1877166	284175	209661	567759
BY	1985634	287892	155885	509350
GF	1870851	274833	229458	563619
DWX	1864964	338443	205149	530205
BTZ	1881253	279481	216352	561675
HB1	1880741	211637	224955	621428
ZZ6	1867694	316619	196950	557498
RTBS	1939084	323222	171634	504821
H30-6	1901682	217909	252546	566624
DYWB	1862701	253522	209363	613175
SWZS	1883330	291900	206306	557225
MARC	1795578	399402	207636	536145
PELL	1794572	404569	195320	544300

## Sheet: Supp Table S8
Supplementary Table S8. Number of SNP sites that are heterozygous in genomes of different materials
Chromosome	Number of loci	Heterozygous locus	Non-heterozygous locus	Proportion of heterozygous loci
LG1	118459	13	118446	0.00011
LG2	112679	20	112659	0.000177
LG3	104606	8	104598	7.6e-05
LG4	94706	7	94699	7.4e-05
LG5	110240	7	110233	6.3e-05
LG6	98058	15	98043	0.000153
LG7	85452	10	85442	0.000117
LG8	77222	4	77218	5.2e-05
LG9	101788	17	101771	0.000167
LG10	100393	14	100379	0.000139
LG11	90793	6	90787	6.6e-05
LG12	76452	11	76441	0.000144
LG13	93371	6	93365	6.4e-05
LG14	64358	11	64347	0.000171
LG15	82527	13	82514	0.000158
LG16	75789	10	75779	0.000132
LG17	82039	10	82029	0.000122

## Sheet: Supp Table S9
Supplementary Table S9. Number of InDel loci that are heterozygous in genomes of different materials
Chromosome	Number of loci	Heterozygous locus	Non-heterozygous locus	Proportion of heterozygous loci
LG1	4138	3	4135	0.000725
LG2	4053	3	4050	0.00074
LG3	3460	1	3459	0.000289
LG4	3437	4	3433	0.001164
LG5	3754	0	3754	0
LG6	3404	6	3398	0.001763
LG7	2709	3	2706	0.001107
LG8	2380	4	2376	0.001681
LG9	3137	4	3133	0.001275
LG10	3429	0	3429	0
LG11	3031	3	3028	0.00099
LG12	2631	6	2625	0.002281
LG13	3212	1	3211	0.000311
LG14	2100	2	2098	0.000952
LG15	2879	4	2875	0.001389
LG16	2472	2	2470	0.000809
LG17	6076	3	6073	0.000494

## Sheet: Supp Table S10
Supplementary Table S10. Primers for polyploid gene typing screening
Primer name	F	R	Corresponding loci
CH03g12	GCGCTGAAAAAGGTCAGTTT	CAAGGATGCGCATGTATTTG	—
16038Aa	TTCGTGGTTATGGCAGTC	CATTGATGGTGGTCCTCT	LG10：9288618
16038a	GTTGTGATCATCACTGAACC	GACTGAGACAGAACGCTTGA

[truncated: 2 more sheets: Supp Table S11, Supp Table S12]
