# Supplementary material for: Genomic variation analysis and discovery of stable heterozygous loci in Loquat (Eriobotrya japonica)
Source: Research Square preprint supplement (doi:10.21203/rs.3.rs-8035482/v1), 2025-12-08
Supplement: Supplementary file 1 [file afcbec3a40cceae23bdabd2e.pdf]

Supplementary

## Genomic variation analysis and discovery of stable heterozygous loci in Loquat (*Eriobotrya japonica*)

Supplementary Information:

Original image of polypropylene gel electrophoresis.

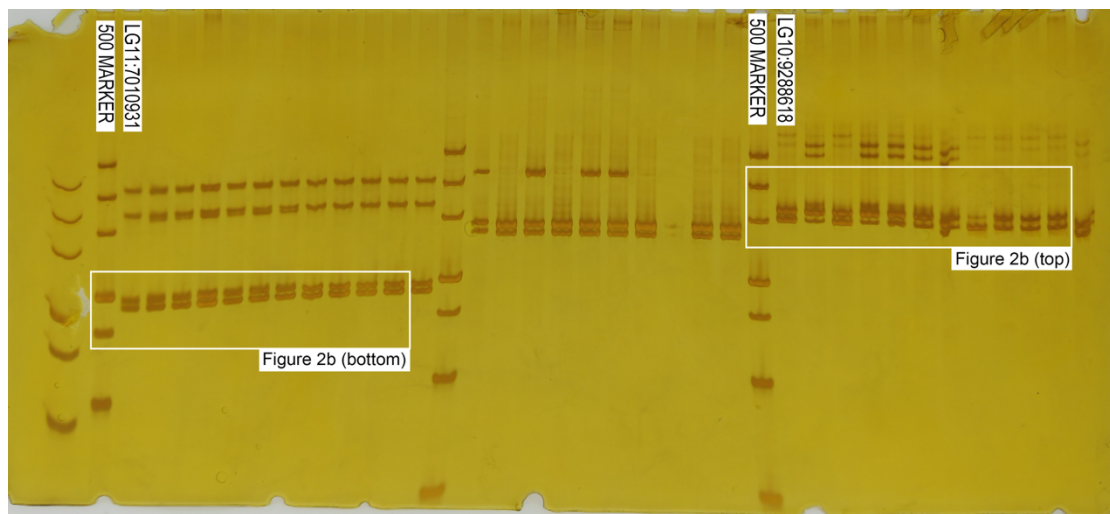

Supplementary Figure S1. Figure 2b (top and bottom)

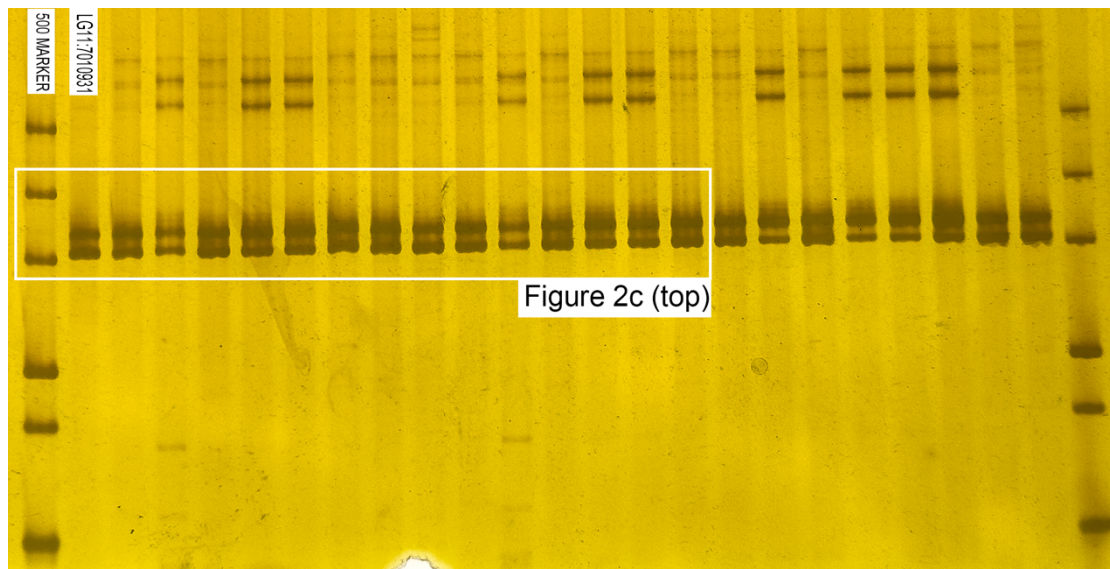

Supplementary Figure S2. Figure 2c (top)

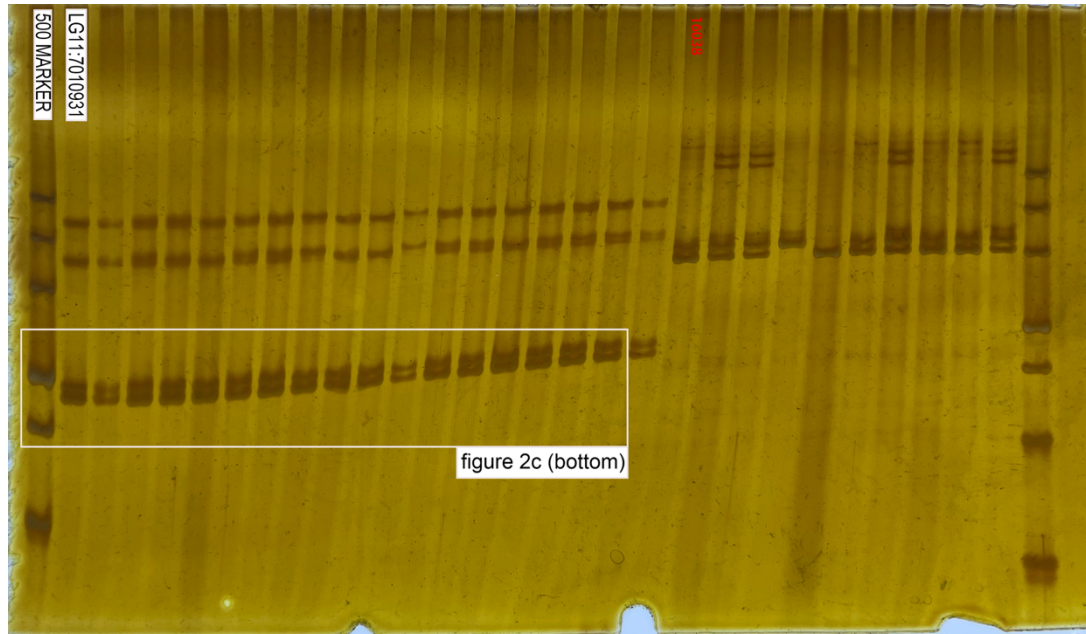

**Supplementary Figure S3.** Figure 2c (bottom)

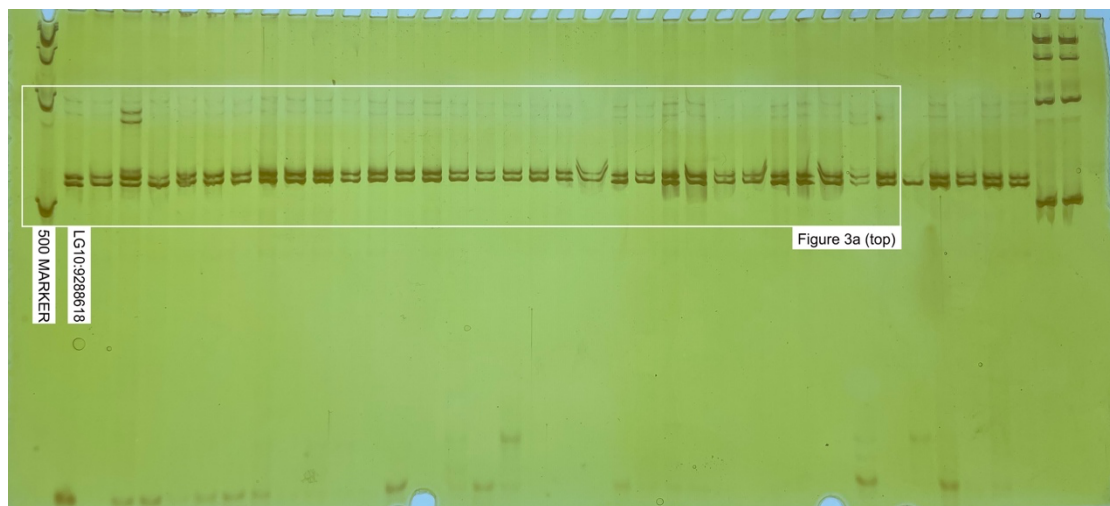

**Supplementary Figure S4.** Figure 3a (top)

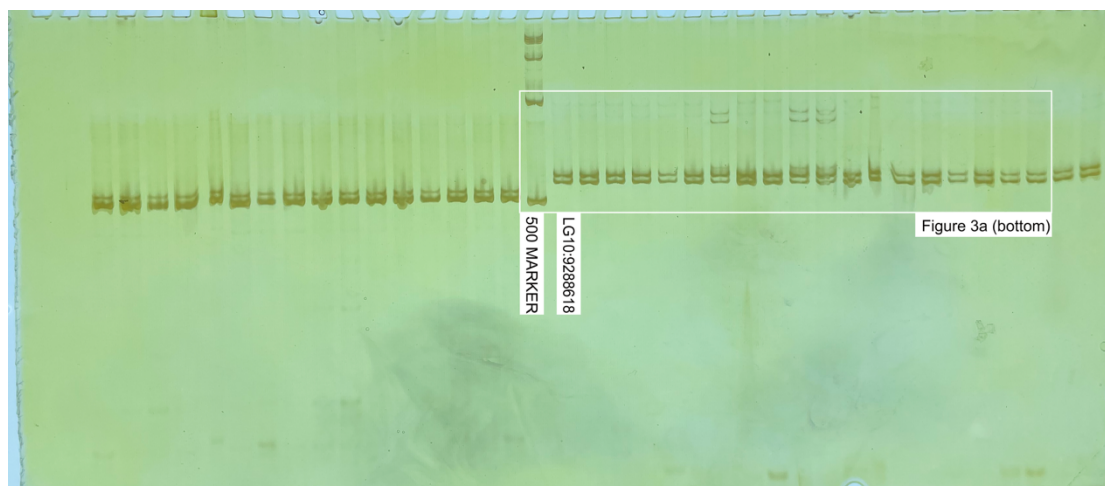

**Supplementary Figure S5.** Figure 3a (bottom)

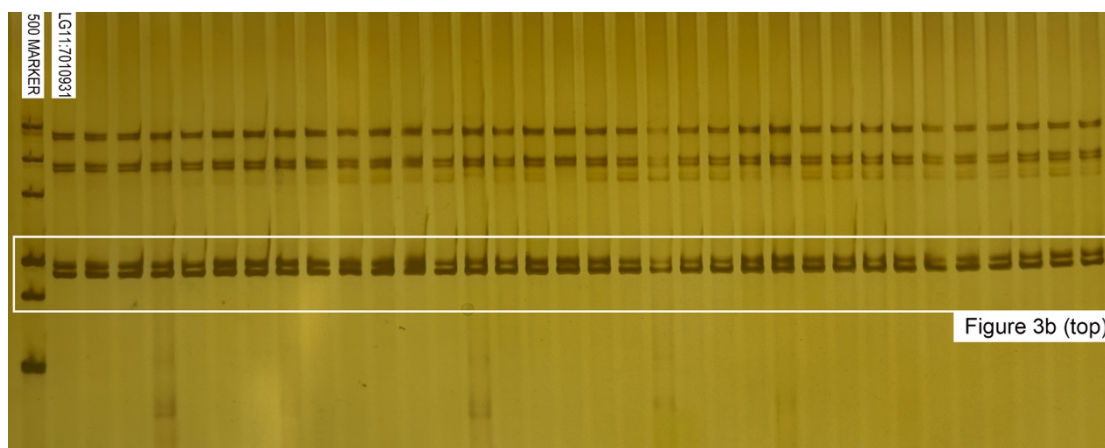

**Supplementary Figure S6.** Figure 3b (top)

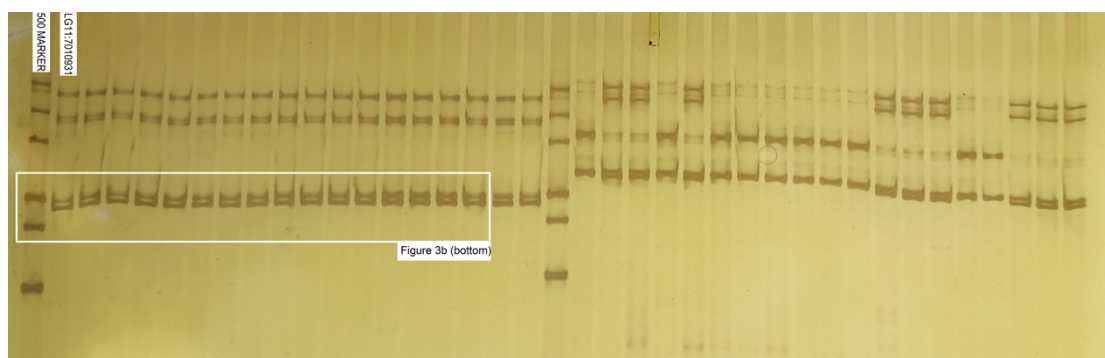

**Supplementary Figure S7.** Figure 3b (bottom)



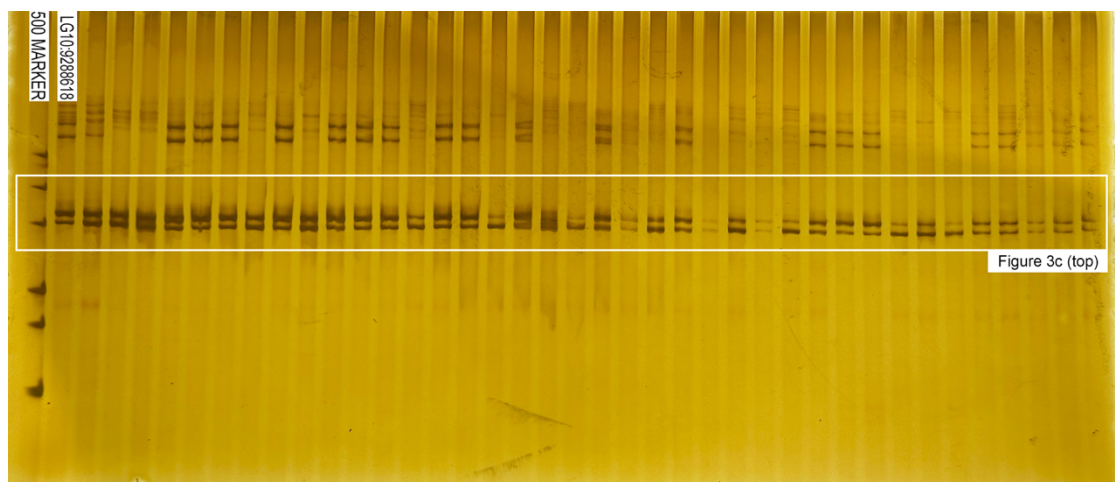

**Supplementary Figure S8.** Figure 3c (top)

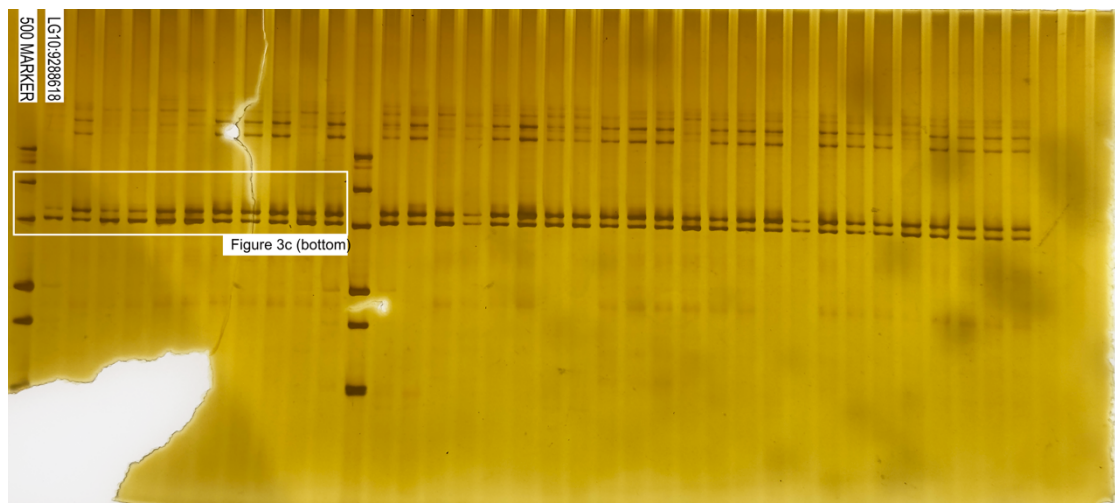

**Supplementary Figure S9.** Figure 3c (bottom)

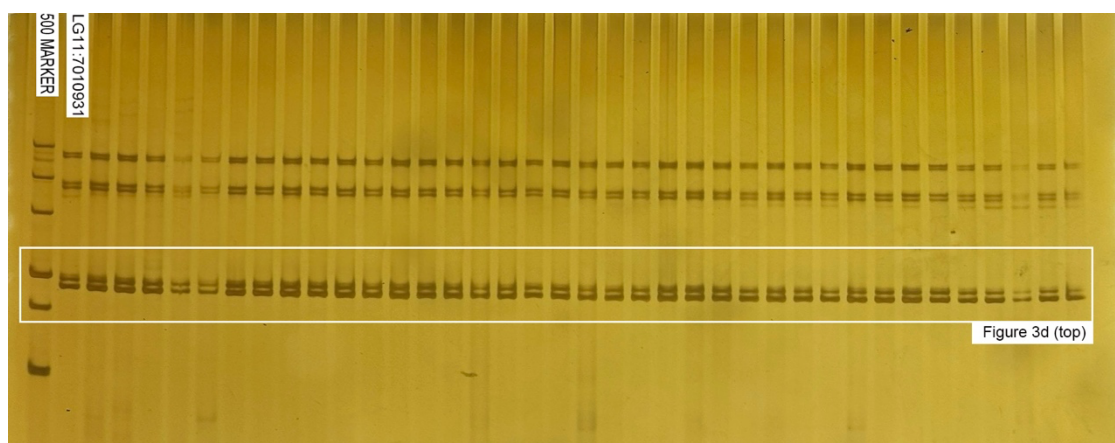

**Supplementary Figure S10.** Figure 3d (top)



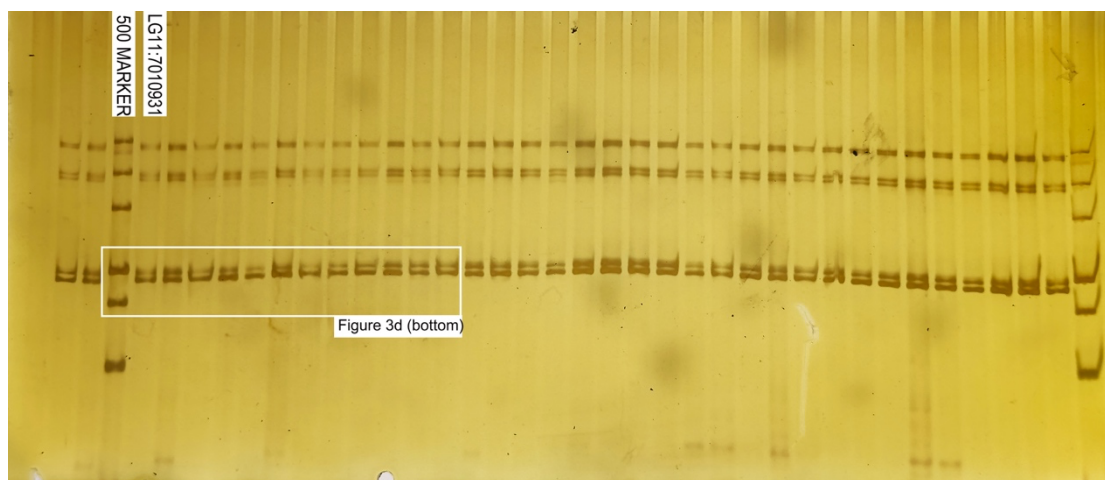

**Supplementary Figure S11.** Figure 3d (bottom)

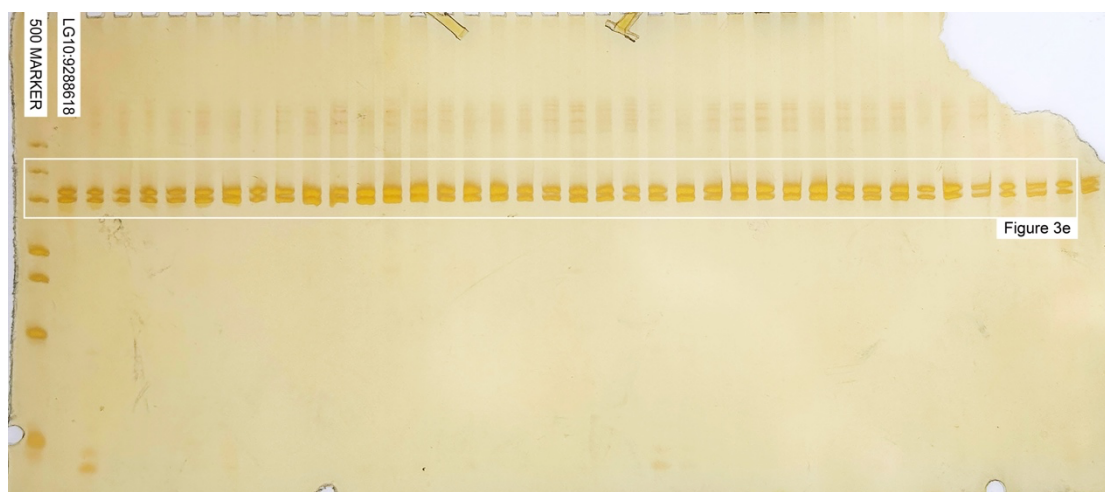

**Supplementary Figure S12.** Figure 3e

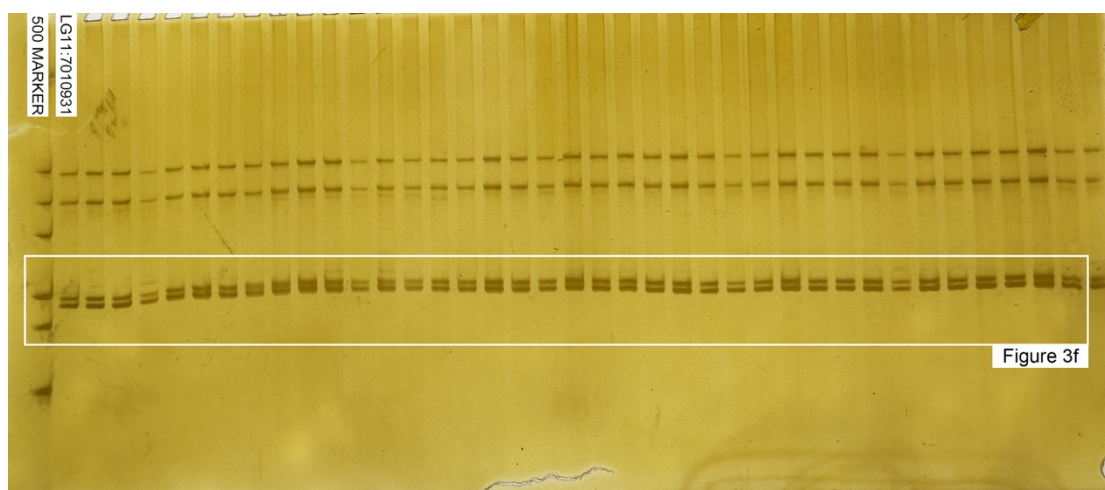

**Supplementary Figure S13.** Figure 3f

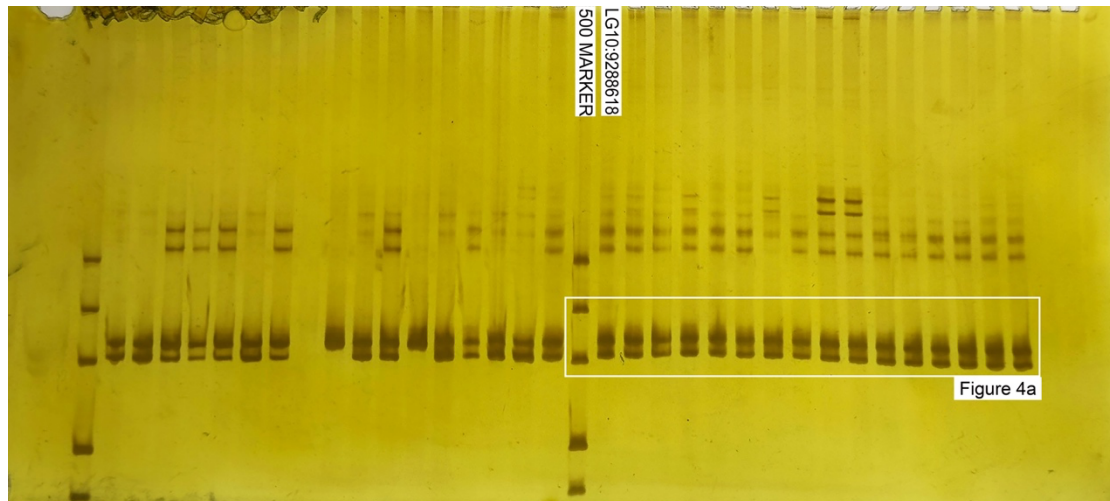

Supplementary Figure S13. Figure 4a

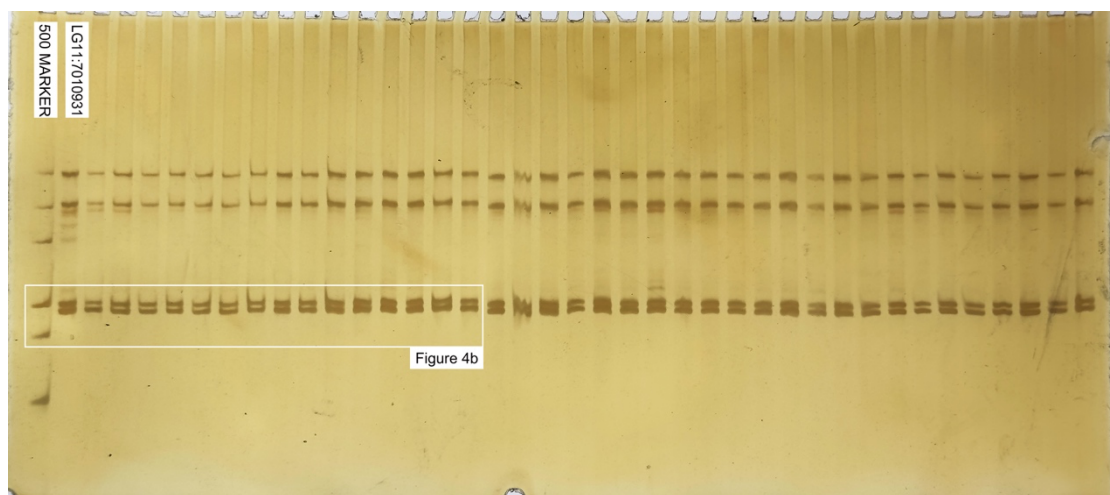

Supplementary Figure S14. Figure 4b

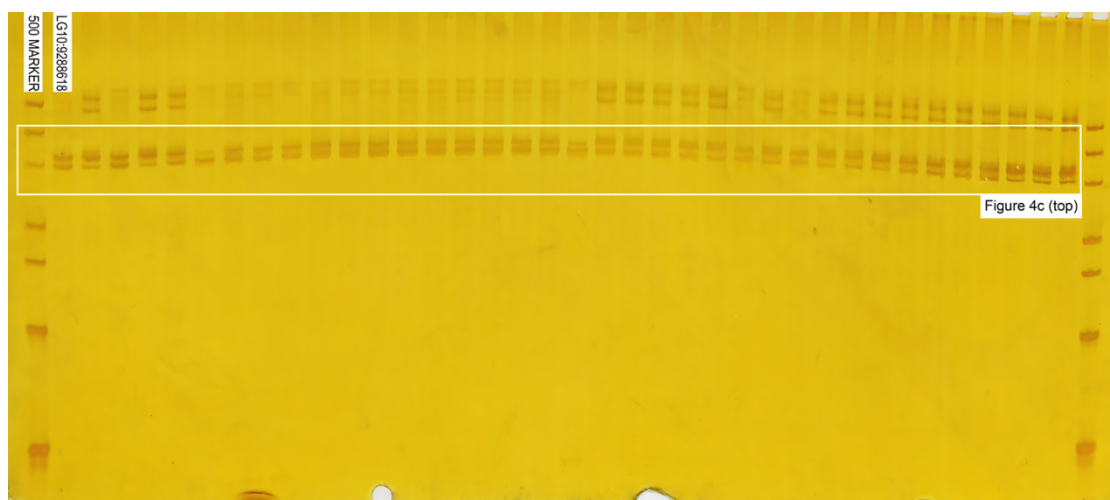

Supplementary Figure S15. Figure 4c (top)



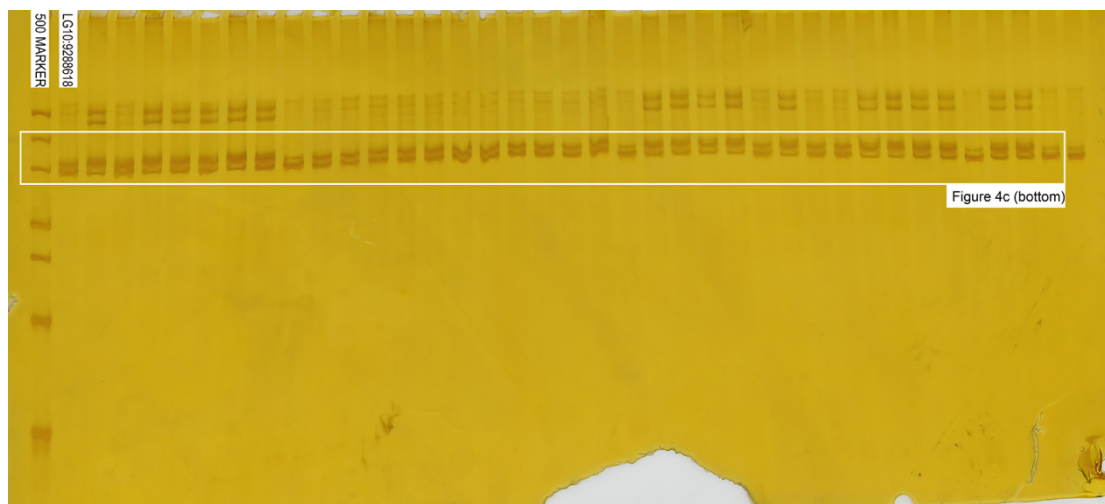

**Supplementary Figure S15.** Figure 4c (bottom)

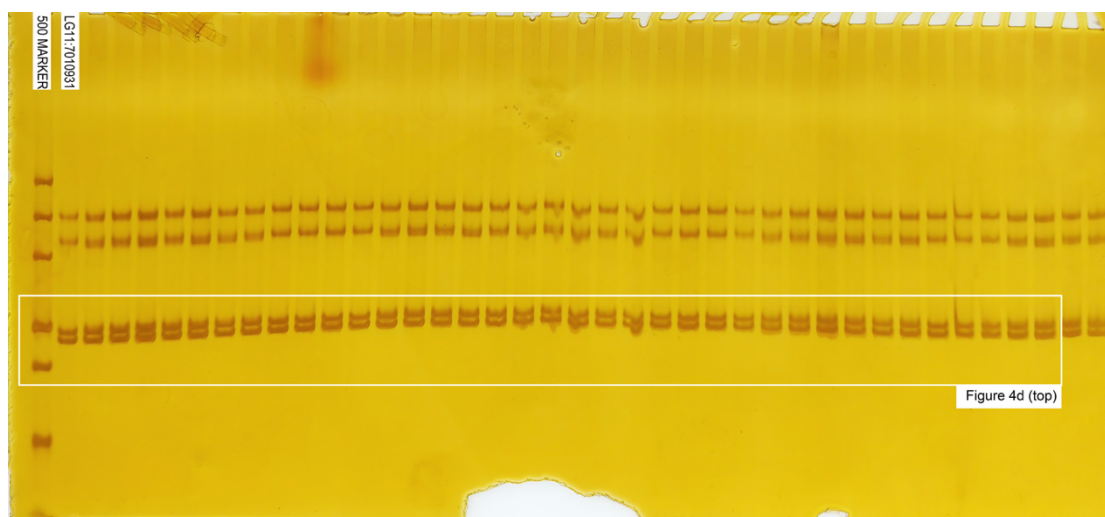

**Supplementary Figure S16.** Figure 4d (top)

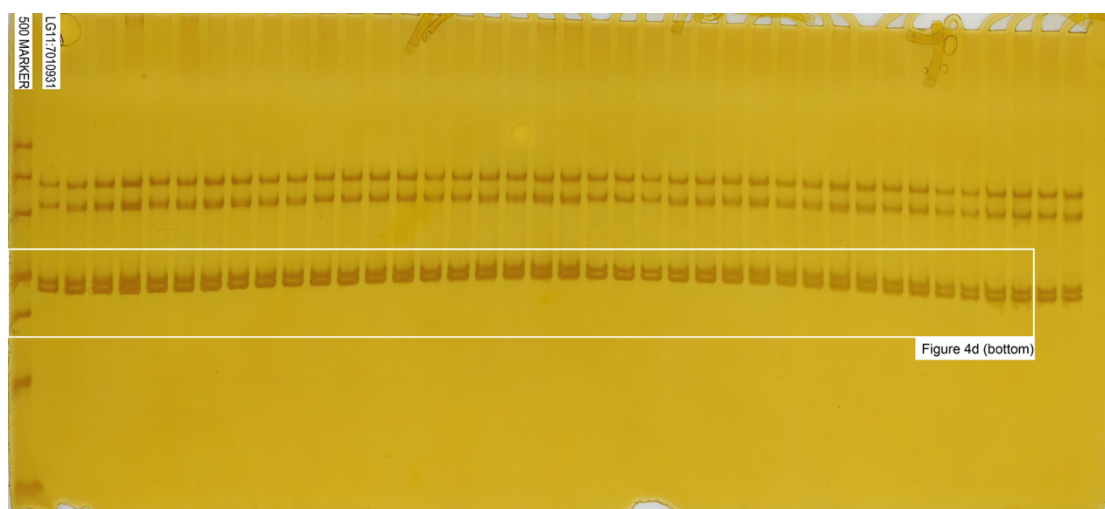

**Supplementary Figure S17.** Figure 4d (bottom)
